# Supplementary material for: Direct-acting antiviral treatment for Hepatitis C Virus in geriatric patients: a real-world retrospective comparison between early and late elderly patients
Source: PeerJ. 2021 Mar 16;9:e10944. doi: 10.7717/peerj.10944 (PMC7977377; doi:10.7717/peerj.10944)
Supplement: Data S1 [file peerj-09-10944-s001.xlsx]

## Sheet: Sheet1
Hepatitis-Type	Age	Survival-time-weeks	Treatment-Course-Weeks	Hight-cm	Body-weight-kg	BMI	creatinine	eGFR	HCVRNA	Genotype	INR	Bilirubin	Albumin	Cirrhosis-No(0)-Yes(1)	Child-Class	SVR-Yes(1)-No(0)	Death-Yes(1)-No(0)	Heart-Disease-Yes(1)-No(0)	DM-Yes(1)-No(0)	Hypertension-Yes(1)-No(0)	Stroke-Yes(1)-No(0)
C	69	49.1429	12	155	60	24.97	0.62	95.72	120911	2	0.9	0.68	4.1	0	A	0	0	0	0	1	0
C	69	114.143	12	150	50	22.22	0.96	57.8	231956	2	0.95	1.21	4.6	0	A	0	0	0	0	0	0
C	68	49.7143	12	160	60	23.44	0.67	118.32	754874	2	0.83	0.35	3.9	0	A	1	0	0	1	1	0
C	80	103.857	12	160	47	18.36	1.02	52.28	32828	1b	0.91	0.44	3.9	0	A	1	0	0	0	0	0
BC	76	76	12	156	60	24.65	1.17	60.77	1105787	1b	0.96	0.6	4	0	A	1	0	0	0	0	0
C	68	165.857	12	160	67	26.17	0.76	102.3	6644644	1b	0.95	1	4.3	1	A	1	0	0	1	0	0
C	71	168.857	12	155	60	24.97	0.54	111.61	2015794	1b	0.98	1.6	3.7	0	A	1	0	0	0	1	0
C	68	87	12	165	62	22.77	0.9	83.92	574379	2	1.03	0.7	3.4	1	A	1	0	0	0	1	0
C	73	114.571	12	145	50	23.78	0.7	82.25	7377729	1b	1.02	0.47	4.1	0	A	1	0	0	0	0	0
C	67	172.143	12	157	56	22.72	0.51	120.65	1131045	1b	1.01	0.86	3.7	1	A	1	0	0	0	0	0
C	71	79.2857	12	158	60	24.03	1	73.87	62597	1b	1.04	0.67	3.8	1	A	1	0	0	1	1	0
C	68	25	12	152.8	62	26.55	0.59	101.67	80243	2	1.01	0.48	3.9	1	A	1	0	0	0	1	0
C	68	54.1429	12	161.4	60	23.03	1.28	56.06	191808	2	0.88	1.12	3.3	0	A	0	0	0	0	1	0
BC	67	95	24	159.6	76	29.84	0.98	76.29	327795	1b	1.23	1.88	3.1	1	A	0	1	0	0	0	0
C	85	0	12	150	45.3	20.13	5.4	6.27	3430	6	10.6	0.4	2.8	0	A	0	0	0	0	0	0
C	79	6.42857	8	150	57	25.33	7.68	5.1	200890	1b	0.83	0.57	2.9	0	A	0	1	0	1	0	0
C	85	7.71429	12	164.9	65	23.9	2.02	31.63	7282302	1b	1	0.65	3.9	1	A	0	1	0	0	0	0
C	70	146.857	12	161.6	67	25.66	0.79	96.97	2894830	1b	0.96	1.83	3.3	1	A	0	0	0	1	0	0
C	76	93	12	170	70	24.22	0.68	113.68	1083600	1b	0.88	0.68	3.5	0	A	0	1	0	1	1	0
C	75	24.5714	12	150	102	45.33	1.23	42.68	180661	2	0.9	0.4	4.2	0	A	1	0	0	1	1	0
C	78	23.8571	12	150	68	30.22	0.97	55.54	5600000	1b	0.97	0.6	4.1	0	A	1	0	0	0	0	0
C	75	24	12	149	34.6	15.58	1.05	51.09	704	1b	1.01	0.62	3.4	0	A	1	0	0	0	1	0
C	66	24.2857	12	147.7	49.7	22.78	0.63	94.84	8455023	1b	0.86	0.3	4.2	0	A	1	0	0	0	0	0
C	66	34.5714	8	146.9	51	23.63	0.67	88.06	367547	2	0.95	1.1	4	0	A	1	0	0	0	0	0
C	83	24	12	169.1	52	18.19	0.92	78.57	1757144	1b	1.57	0.8	4	0	A	1	0	0	0	0	0
C	71	24	12	176.2	63	20.29	0.83	91.59	76427	1	1.16	0.9	3.6	0	A	1	0	0	0	0	0
C	65	26	12	175	70	22.86	1.26	57.62	157609	3,4	0.97	0.5	4.5	0	A	1	0	0	0	0	0
C	80	35.4286	8	159.3	64.8	25.54	2.2	21.31	362	2	0.98	0.5	4.1	0	A	1	0	0	1	1	0
C	71	70.7143	12	158.5	63	25.08	1.03	71.4	853833	2	0.95	1.62	3.6	0	A	1	1	0	1	1	0
C	68	27	12	157.5	64	25.8	0.99	75.4	52335	1b	0.82	0.47	3.6	0	A	1	0	0	0	0	0
C	72	76	8	157.2	50.5	20.44	0.68	85.29	129368	2	0.94	0.5	3.9	0	A	1	0	0	0	0	0
C	72	56.1429	8	148	55	25.11	0.79	71.74	1197833	2	0.89	0.63	3.9	0	A	1	0	0	0	1	0
C	90	114	12	168.9	70	24.54	1.17	58.7	2168787	1b	1.09	0.75	3.5	0	A	1	0	0	0	0	0
C	74	38.2857	12	159.5	48.9	19.22	0.61	95.88	778641	1b	0.97	0.7	4.1	0	A	1	0	0	0	0	0
BC	74	103	12	150	83.5	37.11	0.92	80.64	1387783	1b	0.91	0.36	4.1	0	A	1	0	0	1	1	0
C	67	52	12	175.5	53	17.21	0.83	92.69	1339168	1b	1.09	1	4	0	A	1	0	0	0	0	0
C	78	78.8571	12	147.4	73.5	33.83	0.93	67.42	88828	1b	1.04	0.65	3.6	1	A	1	0	0	1	1	0
C	67	159	12	155	63	26.22	1.05	52.44	1852013	1b	0.9	1.02	4.1	0	A	1	0	0	0	0	0
C	69	154.429	24	155.7	50	20.62	0.7	83.21	51683	1b	0.96	0.8	4.4	0	A	1	0	0	0	0	0
C	76	49.8571	12	154	55	23.19	2.74	16.89	399	1b	0.88	0.28	3.6	1	A	1	0	0	0	0	0
C	67	59.1429	12	138	51	26.78	0.48	129	284322	2	0.89	0.63	4.1	0	A	1	0	0	0	0	0
C	78	59.8571	12	174	65	21.47	1.08	66.3	1514648	2	0.91	0.62	4.2	0	A	1	0	0	0	0	0
BC	86	53.8571	12	154.7	54	22.56	0.58	98.8	211591	1b	0.99	0.73	3.3	1	A	1	0	0	0	0	0
C	69	29	12	156.6	64	26.1	1.11	65.88	1543513	1b	0.97	0.6	3.4	0	A	1	0	0	0	0	0
C	69	21.7143	8	172.7	79.6	26.69	1.11	65.68	4860000	2a	0.98	1.1	4.1	0	A	1	0	0	0	0	0
C	67	124.857	12	147	50	23.14	0.58	120.65	1938233	2	0.98	1.09	3.8	1	A	1	0	0	0	1	0
C	71	172.714	12	153	56	23.92	0.65	90.11	10896	1b	0.89	0.64	4.7	1	A	1	0	0	0	1	0
C	77	46.8571	12	148.2	59.6	27.14	0.54	109.76	734447	1b	0.87	0.74	4.2	0	A	1	0	0	0	0	0
C	69	174.429	12	165	71	26.08	0.78	98.98	5026853	1b	0.85	1.23	4.5	0	A	1	0	0	0	1	0
C	80	149.571	12	157	60	24.34	1.85	26.3	226443	1b	1.23	0.75	3.3	0	A	1	0	0	0	1	0
C	66	55.8571	8	142.3	47	23.21	0.6	100.02	377915	1b	0.96	0.69	4.1	0	A	1	0	0	0	0	0
C	65	105.857	12	168.6	58.2	20.47	0.84	92	1167559	1b	1.19	1.06	4.1	0	A	1	0	0	0	0	0
C	71	27.8571	12	147.2	58	26.77	0.78	73.01	523975	1b	0.88	0.97	4.3	0	A	1	0	0	0	1	0
C	75	141.571	12	152	59.5	25.75	1.14	62.79	469182	1b	0.9	1.29	3.8	1	A	1	0	0	0	1	0
C	78	51.4286	8	152.4	41	17.65	1	53.62	882245	1b	1.3	1.27	2.4	0	A	1	0	0	0	1	1
C	77	101.429	12	168	52	18.42	0.92	79.99	1242398	1b	0.97	1.2	4.3	0	A	1	0	0	1	0	0
C	68	145	12	159	68	26.9	1.27	56.57	834	1	1.02	1.77	4.2	0	A	1	0	0	1	1	0
C	72	48.5714	8	158	58	23.23	2.15	22.59	477337	1b	0.85	0.64	4	0	A	1	0	0	0	0	0
C	79	26	12	162.5	62	23.48	0.81	91.92	2784696	1b	1.02	1.2	4.1	0	A	1	0	0	0	0	0
C	70	54.8571	8	153.3	64	27.23	0.68	85.79	234063	2	0.93	0.46	4.3	0	A	1	0	0	0	0	0
C	72	83.1429	8	150	47	20.89	0.8	70.51	1722073	2	0.99	0.6	4.7	0	A	1	0	0	0	0	0
C	74	94.5714	12	154.1	53	22.32	0.75	75.75	59112	2	1.06	0.7	3.8	1	A	1	0	0	0	1	0
C	88	76	12	146	37	17.36	0.61	92.56	2647603	1b	1.01	0.77	3.8	0	A	1	0	0	0	0	0
C	77	172.143	12	171.9	81.8	27.68	1.35	51.38	16309849	1b	1.04	0.76	4	1	A	1	0	0	1	0	0
C	70	146	12	160	44.1	17.23	0.73	78.82	3926129	1b	0.92	0.86	4	0	A	1	0	0	0	0	0
C	74	99.4286	12	160	47	18.36	0.48	126.78	2437798	1b	0.93	0.71	4.3	0	A	1	0	0	0	0	0
C	80	104.857	12	156	56	23.01	1.04	52.28	2500749	1a	0.92	0.71	3.9	1	A	1	0	0	0	0	0
C	80	150.571	24	155	110	45.79	1.07	49.47	368413	1b	0.91	0.7	3.9	1	A	1	0	0	1	1	0
C	75	81.2857	12	150	52.6	23.38	6.31	6.47	237916	1b	0.87	0.7	3.4	1	A	1	0	0	0	1	0
C	78	95.1429	12	143.6	49.4	23.96	0.6	96.69	1490955	2	1.14	1.59	3.6	1	A	1	0	0	0	0	0
C	70	106.143	12	152	90	38.95	0.95	58.16	299177	2	1.03	1.45	3.8	1	A	1	0	0	0	0	0
C	66	62.5714	12	158.1	55	22	0.66	89.6	2125070	1b	0.93	0.92	4	0	A	1	0	0	0	1	1
C	85	121.571	12	170	79	27.34	1.94	33.13	678258	2	1.42	0.34	3.2	0	A	1	0	0	0	1	0
C	81	127.857	24	150	44	19.56	0.63	90.69	76898	1b	1.07	1.18	3.5	0	A	1	0	0	0	1	0
C	80	38.7143	8	156	55	22.6	1.77	27.67	132422	1b	0.95	0.54	3.1	0	A	1	0	0	0	0	0
C	79	133.714	12	150	54	24	10	83.68	4715284	1b	0.92	0.74	3.6	1	A	1	1	0	0	0	0
C	77	105.143	12	177	73	23.3	10.95	4.6	378805	1b	1.05	0.61	3.6	0	A	1	0	0	1	1	0
C	80	69.2857	12	152.6	50	21.47	0.49	104.7	198233	1b	0.93	0.58	2.5	0	B	1	0	0	0	0	1
C	65	55	12	160	60	23.44	0.85	67.12	1494280	1b	1.03	0.71	3.8	0	A	1	0	0	0	0	0
C	70	145.714	12	169	77	26.96	1.26	56.58	2312308	1b	0.86	1.81	4.3	0	A	1	0	0	0	1	0
C	77	27.1429	12	168	67	23.74	0.96	76.15	571658	2	0.84	1.07	3.5	0	A	1	0	0	0	0	0
C	73	66	12	150.9	58	25.47	0.63	92.89	21005	1b	0.93	0.4	4.1	0	A	1	0	0	0	0	0
C	67	49.8571	12	161	58	22.38	0.6	100.02	23559	2	0.89	0.7	4.2	0	A	1	0	0	0	0	0
C	66	123.714	12	161.1	68.3	26.32	0.89	85.79	1960	2	1	0.49	3.7	0	A	1	0	0	0	1	0
C	72	92.7143	12	173	86	28.73	1.42	49.01	2746	2	0.88	0.73	4.2	0	A	1	0	0	1	1	0
C	69	64.8571	12	151	60.6	26.58	6.09	6.85	599170	2	0.94	0.34	3.5	1	A	1	0	0	1	1	0
C	76	49.2857	12	152	77	33.33	0.63	92.12	6060070	2	1.11	1.1	3.9	1	A	1	0	0	0	0	0
C	80	53	12	157	53	21.5	1.08	48.94	5623027	2	1.01	0.83	4.2	0	A	1	0	0	1	0	0
C	74	27	12	157	60.9	24.71	0.92	59.67	328295	2	0.96	0.7	4.2	0	A	1	0	0	0	0	0
C	79	63.5714	12	149.6	52	23.23	0.78	71.43	1347017	6	1	0.55	4	1	A	1	0	0	1	1	0
C	67	50	12	150	65	28.89	0.66	89.6	4522754	1b	0.97	1.3	4.4	0	A	1	0	0	0	0	0
C	80	98	12	159.2	51	20.12	1.08	65.96	610901	1b	0.97	0.73	4.2	0	A	1	0	0	0	0	0
C	69	120.714	12	178	73	23.04	1.21	59.64	1765037	1b	0.98	1.34	4.1	0	A	1	0	0	0	0	0
C	67	69.4286	8	160	52	20.31	0.29	83.1	1709252	1b	0.95	1.7	4.2	0	A	1	0	0	0	0	0
C	69	71.2857	8	158.5	58	23.09	1.03	71.82	2553667	1b	1.02	0.78	4	0	A	1	0	0	0	0	0
C	83	104.714	12	165	62	22.77	0.77	96.72	1927922	1a	1.01	1.21	4.2	0	A	1	0	0	0	0	0
C	83	66.8571	8	151	62	27.19	8.38	4.57	1469	2a	0.95	0.61	2.6	0	A	1	0	0	0	1	0
C	87	48	12	166	82	29.76	0.82	65.94	1606661	2	0.94	0.76	4.3	0	A	1	0	0	0	0	0
C	66	171.143	12	166	61	22.14	1.05	70.89	6552590	1b	0.92	1.62	4.1	0	A	1	0	0	0	0	0
C	81	118.143	12	145.5	56	26.45	1.06	49.88	3008470	1b	0.91	0.59	3.7	0	A	1	0	0	0	1	0
C	78	67	8	160	53	20.7	8.6	4.49	552381	1b	0.87	0.59	3.8	0	A	1	0	0	0	0	0
C	85	137.857	12	173.6	66	21.9	1.51	43.47	6271255	1b	0.95	0.69	3.7	0	A	1	0	0	0	0	0
C	68	144.571	12	156.1	66.8	27.41	0.73	79.52	2797059	1	0.92	0.92	3.8	0	A	1	0	0	0	1	0
C	66	99.2857	12	173	88	29.4	1.05	70.89	2836052	2	1.02	0.73	3.7	1	A	1	0	0	0	0	0
C	72	66.7143	12	147	45	20.82	0.65	89.85	965089	1b	0.92	0.98	3.7	0	A	1	0	0	0	0	0
C	74	51.7143	8	164.5	56	20.69	1.01	72.41	18595	2	0.96	0.52	3.6	0	A	1	0	0	1	0	0
C	69	49.1429	8	167.5	73	26.02	3.19	19.43	376729	1b	0.91	0.89	4	0	A	1	0	0	0	0	0
C	67	43.2857	8	162.7	71	26.82	0.6	134.8	714	2	0.89	0.4	4.4	0	A	1	0	0	0	0	0
C	83	72	12	148	54	24.65	0.54	108.08	173720	1b	0.9	0.17	3.6	0	A	1	0	0	0	0	0
C	82	99	12	150	52	23.11	1.02	52.01	751972	2	1.37	0.92	3.3	1	A	1	0	0	0	0	1
C	89	116.286	12	159.1	62	24.49	1.54	42.85	439980	1b	0.98	0.95	4.4	0	A	1	0	0	0	0	0
C	78	109.857	12	164	75	27.89	0.74	76.1	1198973	1b	1.05	0.59	4.4	0	A	1	0	0	0	1	0
C	73	85.8571	12	158.7	53	21.04	0.85	65.56	750639	2	0.96	0.69	4	0	A	1	0	0	0	0	0
C	70	103.714	12	152	52	22.51	0.95	78.61	449786	1b	2.69	0.89	3.6	0	A	1	0	0	0	0	0
C	75	173.714	24	153	64	27.34	0.58	101.62	23062	1	1.02	0.8	3.9	1	A	1	0	0	0	1	0
C	80	54.1429	12	160	66	25.78	8.43	4.57	8019506	1a	0.95	0.44	2.8	0	A	1	0	0	0	0	0
C	71	67.4286	12	163	56	21.08	0.84	90.34	663206	1b	0.99	0.88	3.7	0	A	1	0	0	0	0	0
C	74	93.5714	12	150.2	49.1	21.76	0.8	70.31	1618931	2	1.11	0.73	3.7	0	A	1	0	0	0	0	0
C	80	54.4286	12	150.9	64.8	28.46	0.86	63.49	3210152	2	0.89	0.9	3.9	0	A	1	0	0	0	0	0
C	81	56.2857	8	150	51	22.67	4.37	9.7	45433	1b	1.02	0.47	2.7	0	A	1	0	0	0	0	0
C	80	148.429	12	155	45	18.73	0.84	87.92	1031031	1b	1	1.03	3.9	1	A	1	0	0	0	0	0
C	84	34.7143	12	154.3	42.2	17.72	0.5	93.67	913233	1b	0.9	0.6	3.6	0	A	1	0	0	0	1	0
C	75	147.714	12	152	62.2	26.92	0.87	63.47	1559841	1b	0.9	0.46	4	1	A	1	0	0	0	0	0
C	65	112.857	12	158.5	57.6	22.93	0.62	96.61	65882	2	1.03	1.79	4	0	A	1	0	0	0	1	0
C	76	109.143	12	150	48	21.33	0.63	91.88	5465327	1b	0.89	0.46	4	0	A	1	0	0	1	0	0
C	88	29	12	147	45	20.82	1.14	44.98	886813	1b	0.96	0.82	3.8	0	A	1	0	0	1	1	0
C	77	142.571	12	156	54	22.19	0.83	66.84	2131442	1b	0.89	0.65	4.2	0	A	1	0	0	0	1	0
BC	76	29	12	150	40	17.78	0.68	84.12	22286	1b	0.91	0.7	4.7	0	A	1	0	0	0	0	0
C	72	95.5714	12	155	54.5	22.68	0.63	93.15	5954581	2	1	0.68	4	0	A	1	0	0	0	0	0
C	67	101.857	12	161	60	23.15	0.54	112.95	1051	1b	0.98	0.66	4.3	0	A	1	0	0	0	0	0
C	73	151.714	12	152	49	21.21	0.44	140.17	274457	1b	0.96	0.72	4.1	0	A	1	0	0	0	0	0
C	71	35.8571	12	155	62	25.81	0.97	56.77	4728	1b	1.07	0.99	3.2	1	A	1	1	0	0	0	0
C	71	51	12	164.8	70	25.77	0.98	75.62	297381	1b	0.96	0.94	3.8	0	A	1	0	0	0	0	0
BC	77	49.8571	8	139.7	39	19.98	1.09	48.67	2277661	2	0.77	0.31	3.5	0	A	1	0	0	0	0	1
C	71	141	12	152	48	20.78	0.56	107.02	2175287	1b	0.98	0.62	3.7	0	A	1	0	0	1	1	0
BC	65	42.1429	12	153.4	64	27.2	0.73	80.01	1973611	1b	0.89	1.3	4.7	0	A	1	0	0	0	1	0
C	79	27	12	150.3	58	25.67	0.64	89.51	898823	1b	0.95	0.8	4.1	0	A	1	0	0	0	0	0
C	69	95.5714	8	171	60	20.52	10.36	5	546	2	1	0.6	3.5	0	A	1	0	0	0	1	0
C	82	113.714	12	155	43	17.9	0.55	106.08	301242	1b	1.28	0.67	2.3	1	B	1	0	0	0	0	0
C	66	99.5714	12	157.9	62	24.87	0.55	110.58	5099836	6	0.99	0.8	3.9	0	A	1	0	0	0	0	0
C	84	146.714	12	156	62	25.48	7.44	5.22	116138	1b	0.86	0.63	3.4	0	A	0	0	0	0	0	0
BC	80	37	12	154.1	55	23.16	0.89	61.03	5616	1b	0.89	0.63	3.8	0	A	1	0	0	0	0	0
BC	67	146.429	12	164	72	26.77	1.01	73.68	1774542	1b	0.98	1.38	4.5	0	A	1	0	0	1	0	0
C	82	51.5714	12	161.2	45	17.32	0.87	84.22	776247	2b	1.02	0.42	3.9	0	A	1	0	0	0	0	0
C	82	26	12	139.7	41	21.01	1.13	46.21	663206	1b	0.96	0.74	4.1	0	A	1	0	0	1	0	0
C	81	56.4286	12	162	68	25.91	0.74	101.51	475198	1b	1.14	1.49	3.4	0	A	1	1	0	0	0	0
C	72	73.8571	12	171.2	64	21.84	1.01	72.82	3593	1b	1.01	0.8	4.4	0	A	1	0	0	0	0	0
C	75	93.1429	8	161	65	25.08	3.54	16.94	17708	2	0.87	0.27	3.8	0	A	1	0	0	0	0	0
C	81	111.143	12	156	85	34.93	1.01	52.61	261722	1	0.99	0.42	3.2	0	A	1	1	0	0	0	0
C	84	48	8	147	38	17.59	2.47	18.61	5118	2b	1	0.8	4.3	0	A	1	0	0	1	1	0
C	84	38.5714	12	172	62.4	21.09	1.08	72.19	2343	1b	1.13	0.9	4.2	0	A	1	0	0	0	0	0
C	80	102.143	12	159	59	23.34	7.56	6.98	18766	1b	1.03	0.46	3.4	0	A	1	0	0	0	1	0
C	72	22.8571	8	155	57	23.73	1.43	48.61	4350000	1b	1.02	0.6	4.3	0	A	1	0	0	0	0	0
C	82	57.8571	12	167	61	21.87	1.44	47.08	1834913	1b	0.84	0.62	3.9	0	A	1	0	0	0	0	0
C	74	64.4286	12	153	68	29.05	1.16	45.79	988781	2	0.83	0.12	3.3	0	A	1	0	0	1	1	0
C	76	26	12	159	60	23.73	0.94	78.24	61546	1b	1.04	0.5	4.4	0	A	1	0	0	0	0	0
C	66	37.8571	12	156.7	53	21.58	0.74	78.52	714217	1b	0.94	0.9	4.3	0	A	1	0	0	0	1	0
C	72	33.4286	12	152.2	59	25.47	0.79	71.54	1001	1.6	0.91	0.7	3.9	0	A	1	0	0	0	0	0
C	65	148	12	163	54	20.32	1.31	54.91	103982	1b	0.98	1.01	4.3	0	A	1	0	0	0	0	0
C	65	35.5714	12	162.4	56	21.23	0.65	85.66	5852	1b	1.5	2.7	3.4	1	A	1	0	0	0	0	0
C	66	105.143	12	152	74	32.03	0.73	80.01	722564	1b	0.95	0.61	4.1	0	A	1	0	0	0	0	0
C	85	52	8	158	55	22.03	7.2	7.3	1330277	1b	0.91	0.69	3.5	0	A	1	0	0	0	0	0
C	67	49.8571	12	164.6	72	26.57	0.91	83.36	370071	4	0.86	0.56	3.9	0	A	1	0	0	0	0	0
BC	74	137.286	12	160	56	21.88	0.76	74.6	645479	1b	1.05	0.44	3.6	1	A	1	0	0	0	0	0
C	66	103	12	172	75	25.35	0.9	84.43	3229687	1b	0.97	0.69	4.3	0	A	1	0	0	1	1	0
C	82	59.7143	8	166	70	25.4	1.26	54.93	1296268	1b	0.94	0.43	4	0	A	1	0	0	0	1	0
C	76	62	12	148	48	21.91	0.84	66.1	3311	2	0.99	0.58	3.5	0	A	1	0	0	1	1	0
C	71	56.7143	12	150	49	21.78	0.65	90.11	1156684	1b	1	0.81	4.3	0	A	1	0	0	0	0	0
C	75	71	12	153	60	25.63	0.58	101.62	1151869	1b	0.84	0.57	3.8	0	A	1	0	0	0	0	0
C	65	125	12	161.8	67	25.59	1.12	66.01	4620712	1b	0.85	0.78	3.8	0	A	1	0	0	0	0	0
C	65	129.571	12	161	49	18.9	0.87	65.35	2301466	1b	0.89	0.36	3.9	0	A	1	0	0	0	0	0
C	69	109.857	12	167	80	28.69	1.1	66.57	28187	2	0.92	0.94	3.6	1	A	1	0	0	0	0	0
C	82	156.429	12	168.6	70	24.63	1.04	68.54	2408417	1b	0.92	1.19	4.1	0	A	1	0	0	1	0	0
C	78	125.429	12	166.1	65	23.56	0.95	78.79	3008470	1b	0.9	1.77	4.2	1	A	1	0	0	0	0	0
C	75	56.5714	12	158	66	26.44	0.67	86.04	1808760	1b	1.02	1.31	2.7	1	A	1	0	0	0	1	0
C	81	61.5714	8	148	48	21.91	6.44	6.22	85479	1b	0.9	0.66	3.3	0	A	1	0	0	0	0	0
C	83	52.7143	12	151.4	52	22.69	1.05	50.17	325568	1b	0.9	0.53	4.1	1	A	1	0	0	1	1	0
C	77	159.143	12	147	52	24.06	1.3	39.82	7584986	1b	0.94	0.51	4.2	1	A	1	0	0	1	1	0
C	72	157.857	12	172	65	21.97	15	100.82	170	1b	0.94	0.89	4.4	0	A	1	0	0	0	0	0
C	72	26	12	145	63	29.96	0.63	92.89	15063	1b	1	0.6	3.9	0	A	1	0	0	0	0	0
C	66	56	12	150	55	24.44	1.06	52.03	6531081	1b	11.3	0.43	4.2	0	A	1	0	0	1	0	0
C	66	70.7143	8	154	61	25.72	0.63	94.84	1090840	1b	0.91	0.54	3.7	0	A	1	0	0	0	0	0
C	77	105.429	12	164	60.8	22.61	0.86	86.23	174287	1b	1.06	0.57	4.5	0	A	1	0	0	0	1	0
C	66	148.143	12	156	55	22.6	0.63	94.54	846816	1b	0.99	1.44	4.2	0	A	1	0	0	0	0	0
C	65	41.8571	12	153	60	25.63	0.74	78.76	3439520	1b	0.93	0.7	3.6	0	A	1	0	0	0	1	0
C	79	63.5714	12	171	72	24.62	1.05	64.74	103772	1b	0.96	0.58	3.6	0	A	1	0	0	0	0	0
C	78	97.8571	12	164	84	31.23	1.17	60.45	548017	1b	1.09	1.06	3.6	1	A	1	0	0	1	1	0
C	79	72.1429	12	161.1	81	31.21	1.18	59.7	1596812	1b	0.89	0.5	3.5	1	A	1	0	0	0	0	0
C	81	26.2857	12	138.8	61.9	32.13	1.52	32.91	629	1b	0.93	0.7	3.5	0	B	1	0	0	0	0	0
C	78	156.571	24	160	75	29.3	1.32	52.59	1960327	1b	1.08	0.9	3.5	1	A	1	0	0	0	0	0
C	78	147.857	12	167	59	21.16	0.89	82.67	926043	1b	1	0.86	3.8	0	A	1	0	0	0	0	0
C	67	136.714	12	165.5	85	31.03	0.79	72.81	75897	1b	1.1	1.43	3.3	1	A	1	0	0	0	1	0
C	92	51.2857	12	146	44	20.64	0.8	67.23	5433935	1b	0.87	0.88	3.6	0	A	1	0	0	0	0	0
C	85	126.714	12	172	68	22.99	0.94	76.27	376000	1b	1.01	0.83	4	0	A	1	0	0	0	1	0
C	67	66.5714	12	142.3	52.8	26.07	0.55	110.25	202389	1b	1.04	0.35	3.5	0	A	1	0	0	0	0	0
C	71	98.7143	12	163	63	23.71	1.11	65.49	1039942	1b	1.06	1.18	4.2	0	A	1	0	0	0	0	0
C	79	70.1429	12	143.3	49	23.86	0.67	85.12	209273	1b	0.91	0.73	3.8	0	A	1	0	0	0	0	0
C	71	122.143	12	159	52	20.57	1.04	70.6	7193	2	1.03	0.65	4.1	0	A	1	0	0	1	1	0
C	71	67.8571	12	161	63.5	24.5	0.9	83.67	3674520	1b	0.87	0.58	4	0	A	1	0	0	0	0	0
C	79	96.7143	12	151	49	21.49	0.99	59.63	1704778	1b	1	0.37	4	0	A	1	0	0	0	1	0
C	84	93	12	150	42.6	18.93	1.96	24.36	1752332	1b	0.94	0.94	3.3	0	A	1	0	0	0	0	0
C	67	47.7143	12	168	68	24.09	1.22	59.25	2921425	2	0.85	0.88	3.9	0	A	1	0	0	0	0	0
C	78	57.8571	8	158	60	24.03	0.65	88.15	93351	2	0.92	0.81	3.9	0	A	1	0	0	0	0	0
BC	72	104.143	12	162.2	65	24.71	1.88	35.55	2139391	2	1.04	0.94	4.2	1	A	1	0	0	1	1	0
C	73	99.5714	12	149.2	60	26.95	0.59	100.19	210403	1b	1.02	0.87	3.7	0	A	1	0	0	0	0	0
C	68	53.7143	8	156	54	22.19	0.57	105.8	2449302	2	0.99	0.5	4.3	0	A	1	0	0	0	0	0
C	74	102.714	12	164.7	64	23.59	0.64	122.25	32304	2	1.04	0.4	3.8	0	A	1	0	0	0	1	0
C	65	91.8571	12	163	82	30.86	7.05	7.9	16877	2	0.9	0.61	3.9	0	A	1	0	0	1	1	1
C	70	146.714	12	161	62	23.92	8.97	5.89	2018794	1b	0.94	1.31	3.7	0	A	1	0	0	0	1	0
C	74	52.7143	8	156	47	19.31	0.63	92.63	1477365	6	0.89	0.92	4	0	A	1	0	0	0	0	0
C	68	103.571	12	165	80	29.38	1.19	60.79	16273	2	1.12	0.52	3.6	0	A	1	0	0	0	0	0
C	81	100	12	153.1	63	26.88	1.3	53.12	129050	1b	1.09	0.93	4	0	A	1	0	0	0	0	1
C	73	52.1429	8	152	55	23.81	0.73	78.37	155722	2	0.9	1.04	4.2	0	A	1	0	0	0	0	0
C	81	49.2857	12	153	55	23.5	0.65	87.48	157890	1b	0.95	0.6	4.2	0	A	1	0	0	0	0	0
C	75	172.286	24	167.2	60	21.46	1.67	40.31	1014360	1b	0.91	0.56	3.4	0	A	1	0	0	0	0	0
C	82	55.2857	8	158	53	21.23	7.63	6.86	325808	1b	0.9	0.46	3.2	0	A	1	0	0	0	0	0
C	66	63.2857	12	150	74	32.89	1.74	39.7	1269135	1b	0.89	1.02	3.4	0	A	1	0	0	0	0	0
C	79	143.286	12	170	52	17.99	0.83	89.6	1095976	1b	1.2	1.56	4.4	0	A	1	0	0	0	0	0
C	77	113.143	12	148	61	27.85	0.71	85.57	1090199	2	1.07	0.66	3	1	A	1	0	0	0	1	1
C	68	73.2857	12	149	100	45.04	1.35	39.12	9757606	2	0.95	0.58	3.7	0	A	1	0	0	1	1	0
C	69	42	12	152	55	23.81	0.5	150.04	850328	1b	1.26	1.39	2.1	1	B	1	0	0	0	0	0
C	67	64.8571	8	154.8	56	23.37	9.56	4.1	461828	1b	0.83	0.43	2.4	0	A	1	0	0	0	0	0
C	66	35.2857	12	174	63	20.81	1.13	65.13	3660858	2	0.97	0.8	4.2	0	A	1	0	0	0	1	0
C	66	50.5714	12	156	51	20.96	0.53	115.77	410521	1b	1.03	0.39	3.8	0	A	1	0	0	0	0	0
C	65	53.1429	8	157	49.5	20.08	0.61	98.44	22158	1or6	0.85	0.87	4.1	0	A	1	0	0	0	0	0
C	71	35.7143	12	165.2	62.9	23.05	0.65	121.45	237078	1b	1.14	1.3	3	0	A	1	0	0	0	0	0
C	92	98.8571	12	150	49	21.78	0.7	78.44	7546	2	1.01	0.89	3.2	1	A	1	0	0	0	0	0
C	72	37.8571	12	154.1	81	34.11	0.99	96.97	495616	1b	1.06	0.9	3.5	1	B	1	0	0	1	1	0
C	68	26.7143	8	150	50	22.22	0.73	79.52	106334	4	0.98	0.36	4.3	0	A	1	0	0	0	0	0
C	75	35.7143	12	155	40	16.65	0.57	103.4	101990	2	1.07	0.5	4.1	0	A	1	0	0	0	0	0
C	83	36.8571	12	164	67.7	25.17	1.24	55.67	3330000	2	1.08	0.7	3.9	1	A	1	0	0	0	0	0
C	86	38.4286	12	175	55.5	18.12	8.75	5.81	2225814	1b	0.89	0.62	2.9	0	A	1	1	0	0	0	0
C	73	126.286	12	149	54.5	24.55	0.75	75.96	1925122	1b	1.13	1.07	3.9	1	A	1	0	0	0	0	0
C	67	73.7143	8	150	45	20	1.24	43.28	2177	1b	1.01	0.81	3.9	0	A	1	0	0	0	0	0
BC	76	147.286	12	176	73	23.57	1.09	64.58	775299	1b	0.97	0.33	4.1	1	A	1	0	0	0	0	0
C	72	48.2857	8	155	62.5	26.01	6.83	6.3	1775756	1b	0.91	0.5	3.8	0	A	1	0	0	1	1	0
C	82	52.8571	12	153.1	50	21.33	1.45	46.59	3541	1b	0.83	0.66	4.1	0	A	1	0	0	0	0	0
C	72	97.7143	12	169	57.9	20.27	0.87	86.5	17589	2	1	1.22	4.1	0	A	1	0	0	0	1	0
C	76	83.4286	8	151	52	22.81	0.58	101.35	24281	2	1.87	0.66	4.1	0	A	1	0	0	0	1	0
C	79	66	8	149	51	22.97	7.56	5.19	72988	2	0.85	0.39	3.1	0	A	1	0	0	0	0	0
C	78	61.8571	12	164.7	66	24.33	0.73	104.19	465	1b	0.84	1.34	3.1	0	A	1	0	0	0	0	0
C	67	98.8571	12	152	38	16.45	0.7	83.47	671815	1b	1.07	1.08	4.2	0	A	1	0	0	0	0	0
C	76	114	12	152	57	24.67	0.66	87.31	474313	1b	1.05	0.52	3.6	1	A	1	0	0	0	0	0
C	67	149	12	151.2	48.5	21.21	0.5	123.44	795382	1b	0.86	0.67	4.1	0	A	1	0	0	0	0	0
C	82	30.4286	12	145.1	52	24.7	0.84	65.07	2224307	1b	0.94	0.6	4.1	0	A	1	0	0	1	1	0
C	69	93.8571	12	156	43	17.67	0.72	80.55	2412	1b	1.04	0.68	4	0	A	1	0	0	0	0	0
C	78	36.1429	12	160.1	65.2	25.44	4.21	12.61	1360479	1b	0.96	0.4	3.6	1	A	1	0	0	1	0	0
C	67	69	12	170	82	28.37	1.08	68.41	2847395	1b	0.94	2.47	4.4	0	A	1	0	0	0	0	0
C	76	104.429	12	148.8	50	22.58	0.67	85.81	1916691	1b	0.97	0.91	3.9	0	A	1	0	0	0	1	0
C	66	121.286	12	164	53	19.71	0.65	114.72	2001	2	0.96	0.96	4.5	0	A	1	0	0	0	0	0
C	77	121.429	12	168.8	81	28.43	0.86	86.23	6982739	1b	0.99	0.65	4.2	1	A	1	0	0	0	0	0
C	67	174.429	12	157.1	51	20.66	0.69	85.39	2058421	1b	1.1	1.72	3.1	1	A	1	0	0	0	0	0
BC	66	165.571	12	168	37	13.11	0.59	102.3	4977223	1b	0.94	1.04	3.9	1	A	1	0	0	0	0	0
C	68	55	12	163	68	25.59	0.95	78.84	296961	1b	1.01	1.26	3.3	0	A	1	0	0	0	0	0
C	78	71	12	164	69	25.65	0.94	77.82	359799	1b	0.98	0.86	3.7	1	A	1	0	0	0	0	0
C	72	71.2857	8	149.9	65	28.93	1.74	28.84	1266999	2	0.94	0.66	3.5	0	A	1	0	0	0	0	0
C	67	153.714	12	160	57	22.27	0.68	86.57	25436	1b	0.99	0.98	4.1	0	A	1	0	0	0	0	0
C	69	107.714	12	148.2	43.5	19.81	0.64	92.28	88930	2	1.09	0.78	3.9	0	A	1	0	0	0	1	0
C	66	47.7143	8	154	45.4	19.14	0.6	100.33	21147	2	0.98	0.94	4.4	0	A	1	0	0	0	0	0
BC	67	33.8571	12	158	54	21.63	0.47	132.17	3517805	1b	0.92	0.7	3.8	0	A	1	0	0	1	1	0
C	85	69.8571	8	161.1	56.9	21.92	3.47	16.94	3252698	1b	0.9	0.71	4.1	0	A	1	0	0	0	0	1
C	65	154	12	149	45	20.27	0.54	113.66	98486	1b	0.91	0.45	4.2	0	A	1	0	0	0	0	0
C	69	106.571	12	166	60	21.77	0.76	102	1417713	1b	1.02	0.83	4.1	0	A	1	0	0	0	1	0
BC	73	156.571	12	152.7	55	23.59	0.69	83.63	1176740	1b	0.94	1.04	4.1	0	A	1	0	0	0	1	0
C	66	94.1429	12	160	62	24.22	7.82	6.96	15758	2	1	0.52	4.2	1	A	1	0	0	0	1	0
C	84	75.2857	8	161.4	55.8	21.42	1.17	59.68	249160	2	0.85	0.45	3.9	0	A	1	0	0	0	0	0
C	68	71.4286	12	150	66	29.33	8.6	4.62	2850	2	0.95	0.57	3.2	0	A	1	0	0	0	0	0
C	78	35.2857	12	163.1	68	25.56	0.97	75.05	3357	1b	0.92	0.9	3.9	0	A	1	0	0	0	0	0
C	80	87.1429	12	158	53	21.23	0.92	79.16	5280184	1b	0.91	1.3	4.1	0	A	1	0	0	0	0	0
C	74	49	12	160	47	18.36	0.93	79.42	41000	1b	0.96	0.42	4	0	A	1	0	0	0	1	0
C	90	47.7143	8	167	55	19.72	10.1	3.97	1670	1	0.97	0.46	3.5	0	A	1	1	0	0	0	0
C	76	25.4286	12	163	63.3	23.82	0.84	89.08	2068008	1b	1.01	0.82	4	0	A	1	0	0	0	1	0
C	72	95	12	155	55	22.89	0.79	71.74	55987	1b	0.95	0.43	3.8	0	A	1	0	0	0	0	0
C	71	66.7143	12	165	63	23.14	1.12	64.82	8941	1a	1	0.74	3.3	0	A	1	0	0	1	0	0
C	88	32.8571	12	160	43	16.8	2.77	21.76	460690	1b	1.28	0.6	3	0	A	1	0	0	0	0	0
C	80	42	12	148	45	20.54	0.97	55.4	2153921	1b	0.95	0.3	3.5	0	A	1	0	0	0	0	0
C	75	121.714	12	162	58	22.1	1.28	54.94	762388	1b	1.09	1	3.9	0	A	1	0	0	0	0	0
C	79	45	12	144	46	22.18	0.83	66.31	1824810	2	0.97	0.59	3.6	1	A	1	1	0	0	0	0
C	71	59	8	164	81	30.12	10.43	4.94	2910827	2	0.94	0.34	3.2	0	A	1	0	0	0	1	0
C	65	117.143	12	152	50.5	21.86	7.12	5.96	31129	1b	0.95	0.32	4.1	0	A	1	0	0	0	0	0
BC	67	171.857	24	161	67	25.85	0.69	84.86	1174	1	0.9	0.98	3.3	0	A	1	0	0	1	1	0
C	65	52.8571	8	158	58	23.23	0.5	124.22	5405752	2	0.97	0.78	4.3	0	A	1	0	0	0	1	0
C	82	37	12	149	47.3	21.31	0.54	108.35	1947562	2	0.93	0.8	3.1	0	A	1	0	0	1	0	0
C	66	118.571	12	168	85.5	30.29	1.02	73.3	30034	2	0.97	1.82	4.1	0	A	1	0	0	0	0	0
C	66	110.857	12	152	41	17.75	2.2	22.4	66157	1b	1.07	1.64	3.2	1	B	1	0	0	0	0	0
C	68	152	12	151.3	51	22.28	0.57	105.48	137345	1b	0.96	0.94	4.1	1	A	1	0	0	1	0	0
C	68	144	24	148	45	20.54	0.68	86.3	70144	1b	1.03	0.67	3.4	1	A	1	0	0	0	0	0
C	75	133.143	12	175	65	21.22	1.13	63.26	5830	1b	1.02	0.41	3.6	0	A	1	0	0	1	0	0
C	68	59.1429	8	154.2	48.5	20.4	0.61	97.54	24543	1b	0.91	0.36	4.4	0	A	1	0	0	1	1	0
C	77	146.286	12	155	45	18.73	0.86	64.15	2629317	1b	1	1.11	4.1	0	A	1	0	0	0	0	0
C	85	74.2857	12	145	45.7	21.74	1.4	35.82	2531558	1b	0.94	0.73	3.6	1	A	1	0	0	0	1	0
C	73	96.7143	12	162.5	63	23.86	1.21	58.78	837754	1b	1.28	1.48	2.6	1	A	1	0	0	0	0	0
C	71	65.8571	8	160	50	19.53	12.52	4	1857	1b	0.91	0.35	3.1	0	A	1	0	0	0	0	0
C	76	52.5714	12	158	63	25.24	2.27	20.99	798035	2	0.89	0.46	3.7	0	A	1	0	0	1	1	0
C	68	48	8	162.6	61	23.07	0.92	81.81	487342	2	0.9	0.85	3.9	0	A	1	0	0	0	0	0
C	83	43	12	164.6	64	23.62	0.81	91.23	553157	1b	1.03	0.8	3.1	0	A	1	0	0	0	0	0
C	66	49	12	165	65	23.88	1.21	60.37	3006696	1b	0.93	0.35	3.9	0	A	1	0	0	0	0	0
C	66	170.571	12	156	55	22.6	0.87	65.55	3457350	1b	0.94	1.02	4.5	1	A	1	0	0	0	0	0
C	66	50.7143	12	169	70	24.51	1.13	65.13	1999154	1b	0.95	0.85	4	0	A	1	0	0	0	0	0
C	75	72.8571	12	164.9	65	23.9	2	32.82	202303	1b	0.98	0.55	3.3	1	A	1	0	0	0	0	0
C	70	90	12	162	69	26.29	0.8	95.85	19680	2	0.95	0.93	4.5	0	A	1	0	0	0	0	0
C	70	68	12	165	54	19.83	0.7	82.97	6371452	2	0.94	0.48	3.5	0	A	1	0	0	0	0	0
C	72	107.429	12	166	77	27.94	1.03	71.4	613368	6	0.98	0.94	3.6	0	A	1	0	0	0	0	0
C	82	115.143	12	144	59	28.45	0.78	73.98	1380	2	1.31	0.59	3.1	0	A	1	0	0	0	0	0
C	76	77.7143	12	148	49	22.37	0.93	58.77	206029	1b	1.01	1.05	3.7	0	A	1	0	0	0	1	0
C	75	126.286	12	152.4	50	21.53	3.3	18.42	65098	2	0.98	0.38	3.8	0	A	1	0	0	0	1	0
C	84	29.8571	12	163	64	24.09	0.95	75.71	3991077	1b	0.95	1.8	3.8	0	A	1	0	0	0	1	0
BC	72	49.4286	8	147.9	60.6	27.7	0.8	70.71	5461228	2	0.89	0.53	4.4	0	A	1	0	0	0	0	0
C	69	59	12	136	41	22.17	0.96	57.8	3394819	1b	0.94	1.57	3.6	0	A	1	0	0	0	0	0
C	71	26	12	162	52	19.81	0.9	83.18	1590000	1b	1.03	0.5	4.2	0	A	1	0	0	0	0	0
C	71	38.8571	12	143.9	49.3	23.81	0.6	98.83	143	4	1.01	0.84	4	0	A	1	0	0	0	0	1
C	65	48	8	162.1	69.4	26.41	7.51	7.32	246703	2	0.92	0.79	3.5	0	A	1	0	0	1	1	0
C	83	55.2857	12	143	38	18.58	1.12	62.77	5665329	1b	0.97	0.95	3.7	0	A	1	0	0	0	0	0
C	70	53.7143	12	161	63	24.3	1.2	60.03	1437570	1b	0.89	0.82	3.3	0	A	1	0	0	0	1	0
C	77	33.2857	12	161	49.5	19.1	0.56	105.25	26933113	1b	1.02	1.1	3.4	0	A	1	0	0	0	0	0
C	70	97.2857	12	156.3	68.3	27.96	0.73	78.82	2244789	1b	1.09	0.81	4	0	A	1	0	0	0	1	0
C	65	45.7143	12	152	50	21.64	1.09	67.89	1524936	1a	0.87	0.75	4.5	0	A	0	0	0	0	0	0
C	70	37	12	155	68	28.3	0.98	75.84	566042	2	0.89	0.8	4.3	0	A	1	0	0	0	0	0
C	73	62	12	160	50	19.53	0.55	108.65	36447	1b	0.89	0.34	3.9	0	A	1	0	0	0	0	0
C	75	71.2857	12	167	67	24.02	1.08	66.84	61334	1b	0.96	1.16	4	0	A	1	0	0	1	0	0
C	65	76.2857	12	163.5	87	32.54	0.79	98.44	4201002	1a	1.05	0.38	4	1	A	1	1	0	0	0	0
C	75	67.8571	8	165	58	21.3	1.14	62.79	29867	1b	0.98	0.7	3.8	0	A	1	0	0	0	0	0
C	79	70	12	157	70	28.4	0.97	74.85	99453	1b	1.26	1.18	3.7	0	A	1	0	0	0	0	0
C	68	85	12	142.3	46	22.72	0.51	120.29	2063963	2	1.05	1.07	3.9	0	A	1	0	0	0	0	0
C	71	81.5714	12	144.7	59.7	28.51	0.63	93.15	14210	2	1.09	0.42	3.4	1	A	1	0	0	1	1	0
C	71	121.286	12	163	73	27.48	1.15	62.69	1569721	1b	1.1	0.98	3.4	1	A	1	0	0	0	0	0
C	70	170.857	12	159	65	25.71	1.18	61.21	2176554	1b	0.92	1.43	4.5	0	A	1	0	0	1	0	0
C	72	65.4286	12	151	50	21.93	0.92	60.18	6276012	1b	0.97	1.69	4	0	A	1	0	0	1	0	0
C	65	51.5714	12	162	53	20.2	0.67	88.61	6757113	2	0.97	1.29	4.4	1	A	1	0	0	0	0	0
C	66	60	8	156	45	18.49	3.97	15.28	7778	1b	0.89	0.26	2	0	A	1	0	0	0	1	0
C	77	26	12	171	54	18.47	0.82	91.1	545250	1b	0.91	0.5	3.5	0	A	1	0	0	0	0	0
C	67	131.143	24	150	73	32.44	0.49	126.35	471355	1a	0.97	1.08	3.3	1	A	1	1	0	1	0	0
C	67	20	8	151	55	24.12	0.65	90.92	7710000	1b	0.92	0.4	4.1	0	A	1	0	0	0	0	0
C	85	69.1429	8	169.8	56	19.42	9.04	5.6	1543896	1b	0.97	0.7	3.7	0	A	1	0	0	0	0	0
C	68	64.5714	12	161.6	51	19.53	0.92	82.06	1757879	1b	1.05	0.5	3.8	0	A	1	0	0	0	0	0
C	67	114	12	163	70	26.35	1.91	35.43	1613508	1b	1	0.47	4	0	A	1	0	0	0	0	0
C	76	35.8571	12	171.8	56.4	19.11	0.7	109.65	59131	2	1.21	0.98	4.1	0	A	1	0	0	0	0	0
C	69	86.1429	12	163	61	22.96	0.99	60.71	3607971	2	1	0.5	4.6	0	A	1	0	0	0	0	0
C	67	31.2857	8	164	92.8	34.5	9.31	5.68	361999	1b	1.33	0.93	3.6	0	A	1	0	0	0	0	0
C	65	120	12	158	64	25.64	0.99	76.11	1591464	1b	1.03	1.14	3.9	1	A	1	0	0	0	0	0
C	70	92.4286	12	150.5	51.4	22.69	0.67	87.27	75993	1b	1.02	0.74	3.3	0	A	1	0	0	0	0	0
BC	79	32	12	159.8	76.5	29.96	0.96	75.75	111909	2	0.96	0.8	4.6	0	A	1	0	0	0	0	0
C	66	145.143	12	143.2	47	22.92	0.65	88.33	2684082	1b	1.02	1.24	3.7	1	A	1	0	0	0	1	0
C	76	21.7143	8	156.6	53	21.61	0.9	60.88	849	1b	0.83	0.85	4.2	0	A	1	0	0	0	0	0
C	83	26	12	148	43	19.63	0.85	63.87	9860000	1b	0.94	0.6	4	0	A	1	0	0	0	1	0
C	78	27.7143	12	157	60	24.34	1.44	47.45	11870	2	1.15	2.4	2.9	0	A	1	0	0	0	0	0
C	71	25.5714	12	164	62	23.05	0.97	76.3	32961	1b	1.02	0.5	4.3	0	A	1	0	0	0	0	0
C	74	29.4286	12	169.6	90.3	31.39	1.25	56.46	381973	2	0.99	0.8	4.2	0	A	1	0	0	0	0	0
BC	66	32	12	164.4	82	30.34	1.35	53.04	305160	1b	0.97	0.7	3.8	1	A	1	0	0	1	0	0
C	81	143.286	12	149.1	53	23.84	1.12	46.69	60826	1b	0.94	0.66	4	1	A	1	0	0	1	1	0
C	65	42.7143	12	170	62	21.45	0.55	149.5	20271	2	1.36	16.7	3.2	1	A	1	0	0	0	0	0
C	68	58.1429	8	150.7	42	18.49	5.5	7.73	112861	1b	0.89	0.91	3.2	0	A	1	0	0	0	0	0
C	77	101	12	151.3	55	24.03	0.81	86.84	433	1b	1.05	0.57	4	0	A	1	0	0	0	0	0
C	83	155	24	149.2	62	27.85	1.08	48.45	59634	1b	0.9	1.05	4.1	0	A	1	0	0	1	1	0
C	84	39.5714	12	149	40	18.02	0.93	58.3	597966	1b	0.88	0.92	3.2	0	A	1	1	0	1	1	0
C	80	49.2857	12	156.9	57.1	23.19	1.19	43.87	2091847	2	1.15	0.5	3.8	0	A	1	0	0	0	0	0
C	73	5.14286	12	142	40	19.84	0.69	83.63	158897	2	0.95	0.64	3	1	A	0	1	0	1	1	0
C	77	67	12	145.6	43.3	20.43	0.9	60.88	5209802	2	1.02	0.97	3.5	0	A	1	0	0	0	0	0
C	66	50.4286	12	159.5	63	24.76	1.27	42.1	113198	1b	0.97	1.53	2.8	0	A	1	0	0	1	1	1
C	72	98.2857	12	165	65	23.88	0.7	111.17	919577	1b	1.07	1.23	3.6	0	A	1	0	0	0	0	0
C	66	119.571	12	153	59	25.2	0.67	88.33	203599	1b	0.95	0.8	3.9	0	A	1	0	0	0	0	0
C	77	58	12	141	40	20.12	0.51	117.25	65496	1b	0.97	0.66	4	0	A	1	0	0	0	0	0
C	77	33	12	160	56	21.88	0.97	78.79	9102	1b	1.27	1.3	4	1	A	1	0	0	1	0	0
C	67	125.857	12	148	56	25.57	0.59	101.98	4197392	2	1.02	0.85	3.8	0	A	1	0	0	0	0	0
C	83	50	12	149.2	67	30.1	0.86	63.02	3015	1b	0.9	0.64	3.5	0	A	1	0	0	0	0	0
C	82	26.7143	12	160	57	22.27	1.11	63.58	64	2	1.13	1.1	3.6	0	A	1	0	0	1	1	0
C	65	155.857	12	153	56.2	24.01	1.02	73.53	4081668	1b	0.99	0.96	4.7	0	A	1	0	0	0	1	0
C	75	162.143	24	142.2	58	28.68	1.01	53.43	370953	1b	1.1	1.44	3.5	1	A	1	0	0	0	0	0
C	69	111.286	12	160	66	25.78	0.66	88.8	2024630	1b	0.91	0.64	3.8	0	A	1	0	0	0	0	0
C	65	156	24	153	67	28.62	0.59	102.62	3237	1b	1.1	1.32	4.1	0	A	1	0	1	1	1	0
C	68	28.5714	12	167.6	68	24.21	0.67	118.32	22078	1b	1.27	3.42	2.8	1	B	1	1	0	0	1	0
C	80	156	12	144.4	49.6	23.79	0.77	72.31	1912100	1b	0.93	0.52	3.7	0	A	1	0	0	0	1	0
C	73	162.857	24	159.1	60	23.7	0.73	105.61	1476258	1b	0.96	0.82	3.7	1	A	0	0	0	0	0	0
C	71	58	12	162	64	24.39	1.55	44.55	267736	2	0.84	0.63	4.4	0	A	1	0	0	1	1	0
C	65	112.286	12	163	57	21.45	0.81	95.64	3320354	1b	1	0.71	3.4	0	A	1	0	0	0	0	0
C	74	101	12	147	66	30.54	0.52	115.59	5933	2	1.05	0.67	3.9	0	A	1	0	0	0	1	0
C	79	154.143	24	154.2	61	25.65	1.53	41.42	58018	1	0.98	0.65	3.6	1	A	1	0	0	1	1	0
C	67	110.571	12	161	64	24.69	1.31	54.58	1359599	1b	1.13	1.02	3.4	0	A	1	0	0	0	0	0
C	85	62.4286	12	149	55	24.77	0.83	65.49	588	1b	1.1	1.92	2.9	1	A	1	0	0	0	0	0
C	78	159.143	12	157.5	63.7	25.68	0.66	86.84	10896	1b	0.99	1.41	3.7	1	A	1	0	0	1	1	0
C	65	154.714	24	176	97	31.31	1.2	56.58	979437	1	1.07	1.04	3.7	1	A	1	0	0	1	1	0
C	70	173.857	12	155	70	29.14	0.51	119.57	919577	1b	1.02	1.01	4	1	A	1	0	0	0	0	0
C	66	35.2857	12	158	59	23.63	5.97	9.51	5744	2	0.95	0.47	3.5	1	A	1	0	0	0	1	0
C	90	139.286	12	167.9	53	18.8	0.87	60.96	145699	1	1.04	1.16	3.6	1	A	1	0	0	0	0	0
C	90	126.143	12	152	52	22.51	1.44	34.27	2935281	1b	0.95	0.74	3.6	1	A	1	0	0	1	1	0
C	76	126.857	12	153	56	23.92	0.83	67.02	60246	2	1.06	0.57	3.2	1	A	1	0	0	1	1	0
C	68	104.714	12	150	60	26.67	0.48	128.61	4537	2	1.16	0.8	3.4	1	A	1	0	0	0	0	0
BC	80	149.857	12	153	43	18.37	0.56	104.43	9281	1b	0.82	0.66	3.8	0	A	1	0	0	0	1	0
C	72	33.4286	12	152	62	26.84	0.8	71.54	123636	1b	0.88	0.6	3.9	0	A	1	0	0	0	0	0
C	75	143.429	24	152	52	22.51	0.82	67.96	1416630	1b	1.07	1.23	3.2	1	A	1	0	0	0	0	0
C	66	49.4286	12	150	70	31.11	0.68	86.84	2359	2	1.16	0.65	3.6	0	A	1	0	0	1	1	0
C	71	12.8571	12	165	70	25.71	6.74	8.15	143628	2	0.96	0.97	3.3	1	A	0	1	0	0	0	0
C	85	104.571	12	146	40.8	19.14	0.67	112.74	812079	1b	1.07	0.99	3.3	1	B	1	0	0	0	0	0
C	73	159	12	174	74	24.44	0.94	78.67	2307498	1b	0.99	1.37	4	0	A	1	0	0	1	1	0
C	75	151.286	12	160	60	23.44	0.88	62.64	33482	1b	1.01	0.98	4.1	0	A	1	0	0	0	0	0
C	80	47.4286	12	151.8	60	26.04	0.74	75.71	16256	2	1.09	1.43	3.5	1	A	1	0	0	0	1	0
C	71	20.8571	8	163	55	20.7	10.77	4.76	34429	1b	0.96	0.44	3.3	0	A	1	1	0	0	0	0
C	83	15.8571	12	167	60	21.51	2.02	31.78	37489	1b	0.88	0.46	3.6	0	A	0	1	0	0	0	0
C	67	142.286	12	166	80	29.03	1.24	58.15	153100	1b	0.97	0.68	3.7	0	A	1	0	0	0	0	0
C	67	168.714	12	155.4	67.8	28.08	0.55	110.58	4433709	1b	1.08	1.24	3.6	0	A	1	0	0	0	0	0
C	73	48	12	165	63	23.14	0.97	76.08	18204	2	1.22	1.48	3.6	1	B	1	1	0	0	0	0
C	71	159.143	24	157.3	75	30.31	0.87	64.37	612594	1b	0.96	1.09	3.4	1	A	1	0	0	1	1	0
C	89	31.5714	12	145	47	22.35	0.72	76.27	9620000	1b	1.09	0.6	3.6	0	A	1	0	0	0	0	0
C	69	107.143	12	141	48	24.14	0.63	93.97	17210	1a	1.06	0.84	4.2	0	A	1	0	0	1	0	1
C	65	153.286	12	171	52	17.78	1.04	71.9	376087	1b	0.91	1.02	4.5	0	A	1	0	0	0	0	0
C	71	26.4286	12	150.9	49.3	21.65	0.63	93.15	1680376	1b	1	0.8	3.5	0	A	1	0	0	0	0	0
BC	78	92	12	152.5	63	27.09	0.48	138.29	3231985	1b	1.25	1.34	2.8	1	A	1	0	0	0	0	0
C	81	20.7143	12	147.8	50	22.89	1.13	46.21	147	2	0.97	1.34	3.3	1	A	0	1	0	0	0	0
C	83	57.7143	12	160.5	68.5	26.59	1.69	38.95	11949907	2	0.75	0.56	4	0	A	1	0	0	0	0	0
C	66	25.4286	12	175	76	24.82	1.07	69.36	1217873	1b	0.9	1.24	4.3	0	A	1	0	0	0	0	0
C	79	114.571	12	160	52	20.31	0.63	91.39	3717	2	1.11	0.99	3.7	0	A	1	0	0	0	0	0
C	76	103.714	12	152	48	20.78	0.87	63.47	18639	1b	0.93	0.42	4	0	A	1	0	0	0	1	0
C	77	175.857	12	176	70	22.6	0.94	77.82	1069296	1b	0.91	1.05	3.7	1	A	1	0	0	0	1	0
C	69	105.143	12	160	60	23.44	0.8	71.33	206945	1b	0.97	0.66	3.8	0	A	1	0	0	0	0	0
C	71	155.571	24	150	45	20	1	54.81	254204	1b	0.78	0.73	2.7	0	A	1	0	0	0	0	0
C	76	39.7143	12	149	56	25.22	1.09	48.93	567192	1b	1.36	2.27	3.2	1	B	1	1	0	0	0	0
C	79	158.286	24	148	63	28.76	0.63	91.39	834576	1b	1.02	1.16	3.5	1	A	1	0	0	0	0	0
C	73	168.857	12	154	65	27.41	0.73	78.37	736844	1b	1.12	1.93	3.4	1	A	1	0	0	0	0	0
C	68	159.714	24	158	62	24.84	0.81	94.76	800867	1b	1.04	1.11	3.5	0	A	1	0	0	0	0	0
C	74	153.429	24	150.3	46	20.36	0.61	112.76	491517	1b	0.91	0.57	3.8	0	A	0	0	0	0	0	0
C	80	33.5714	12	160.2	59.1	23.03	0.82	90.63	525978	1b	1.03	1	3.2	1	B	1	0	0	0	1	0
C	68	74.7143	12	162	67	25.53	1.01	73.68	1242604	1a	1.14	0.91	3.1	0	A	1	0	0	0	0	0
C	68	175.143	12	145.8	58	27.28	0.58	103.69	42131	1b	1.03	0.95	3.5	1	A	1	0	0	0	0	0
C	75	125.857	12	144	41	19.77	0.73	77.93	3492	1b	1.12	1.97	3.8	1	A	1	0	0	0	1	0
C	86	47.8571	12	141.9	48	23.84	1	52.7	264569	1b	0.96	1.69	4.3	0	A	1	0	0	0	0	0
C	68	150.714	24	165	67	24.61	0.75	77.08	27868	1	0.95	0.69	4	0	A	1	0	0	0	0	0
BC	73	135.429	24	178	72.8	22.98	1.75	38.4	8129	1b	0.94	0.62	3.5	1	A	1	1	0	1	1	0
C	75	33	12	153	61	26.06	0.6	97.46	16800000	1b	0.97	0.7	3.8	1	A	1	0	0	1	1	0
C	67	28	12	164	58	21.56	1.17	62.18	136591	1b	1.06	0.9	3.4	0	A	1	1	0	0	0	0
C	73	111.286	24	155	57	23.73	1.37	37.9	1716999	1a	0.94	1.19	3.8	1	A	1	1	0	0	0	0
BC	71	127.857	12	171	56	19.15	1.09	67.08	2139157	2	0.95	1.37	4.4	1	A	1	0	0	0	0	0
C	70	59.4286	12	171	80.6	27.56	0.75	103.26	1145956	2	0.99	1.16	3.9	0	A	1	0	0	0	0	0
C	67	165.714	24	156	64	26.3	0.72	81.04	1667560	1	1	0.65	3.7	1	A	1	0	0	1	0	0
BC	74	8	12	168	66	23.38	7.59	7.06	2488677	1b	0.89	0.44	3.8	0	A	0	1	0	1	1	0
C	74	145.714	12	150	76	33.78	1.16	45.79	36360	1b	1.09	0.9	3.8	0	A	1	0	0	0	0	0
C	87	121.286	24	160	44	17.19	0.94	56.46	824135	1b	0.92	1.1	3.2	1	A	1	1	0	0	1	0
C	86	50	12	138	38	19.95	0.87	61.74	2235137	1b	0.89	0.6	3.8	0	A	1	0	0	1	1	0
C	75	49.1429	12	153.2	59	25.14	0.82	68.15	454494	1b	1.04	0.71	2.9	1	A	1	0	0	0	0	0
C	78	104.286	12	153	64.3	27.47	1.24	56.38	2895180	1b	0.97	0.41	4.2	1	A	1	0	0	1	1	0
C	65	34	12	172	80	27.04	1.41	50.6	641113	1b	1.08	1.5	3.3	0	A	1	0	0	0	0	0
C	66	146.714	12	165	58	21.3	0.96	78.37	39758	1b	0.92	0.81	3.7	0	A	1	0	0	0	1	0
C	69	101	12	158	72	28.84	1.14	63.69	100595	1b	1.18	0.82	2.7	1	B	1	0	0	0	0	0
C	86	96	12	164	83	30.86	0.89	81.24	186199	1b	1.07	0.45	3.4	0	A	1	0	0	1	1	0
C	69	147.857	12	160	50	19.53	0.87	87.26	141748	1b	0.95	0.6	3.8	0	A	1	0	0	0	0	0
C	75	149	24	143	51	24.94	0.61	82.94	189445	1	0.89	0.74	3.6	1	A	1	0	0	1	0	0
C	69	103.143	12	147	47	21.75	0.58	103.38	113435	2	0.97	0.64	3.7	0	A	1	0	0	0	0	0
C	67	149.571	24	162	60	22.86	1.25	42.75	1289868	1b	0.89	0.98	4.8	0	A	1	0	0	0	0	0
C	66	166	24	153	71.1	30.37	0.57	106.45	1491302	1	1.03	1.18	4.2	1	A	1	0	0	1	1	0
BC	88	41.7143	12	163	56	21.08	1.98	23.84	720	2	0.93	0.26	3.5	1	A	1	1	0	0	0	0
C	67	148.857	12	159.5	51.1	20.09	1.25	57.79	739325	1b	0.98	0.68	4.5	0	A	1	0	0	0	0	0
C	65	152	12	150	65	28.89	0.73	80.26	607283	1b	0.95	0.56	3.8	0	A	1	0	0	0	0	0
C	69	113.571	12	161.3	59.5	22.87	0.71	81.86	845245	1b	0.92	0.82	4.4	0	A	1	0	0	0	0	0
C	78	170.571	12	157	55	22.31	1.08	49.19	4326375	1b	0.96	1.01	3.9	1	A	1	0	0	1	1	0
C	77	103.286	12	155	60	24.97	0.98	55.18	215683	1b	1.02	0.53	3.9	0	A	1	0	0	0	1	0
C	65	68.7143	8	164	64	23.8	0.42	204.72	1412732	2	0.98	0.55	3.8	0	A	1	0	0	0	0	0
C	67	48.8571	12	148	55	25.11	0.8	71.76	12330	2	0.93	0.66	4.2	0	A	1	0	0	0	1	0
C	77	103.857	12	148	45	20.54	0.54	109.76	2416597	1b	1.13	0.93	3.8	0	A	1	0	0	0	0	0
C	82	158.857	24	159.5	75	29.48	0.8	68.84	1839330	1b	1.02	0.94	3.5	0	A	1	0	0	0	1	0
BC	71	164.857	12	151.2	72	31.49	0.68	85.54	259302	1b	0.97	0.35	3.9	0	A	1	0	0	0	0	0
C	69	69	12	160	52	20.31	1.13	64.53	2733483	1b	0.92	0.54	3.4	0	A	1	0	0	0	0	0
C	67	47	12	169.6	80	27.81	0.88	86.38	34730	1b	0.91	0.6	4.1	0	A	1	0	0	0	0	0
C	71	174.714	12	163	70	26.35	1	73.87	2207912	1b	0.91	1.14	4	0	A	1	0	0	0	0	0
C	66	104.429	12	171	72	24.62	0.95	79.57	2914430	1b	1.07	0.81	3.9	1	A	1	0	0	0	1	0
C	69	71.2857	12	155	55	22.89	7.87	5.1	59920	1b	1.06	0.41	2.9	0	A	1	0	0	0	0	0
C	65	54	12	152	63.5	27.48	0.56	108.99	1667162	1b	0.96	0.51	4.1	0	A	1	0	0	0	0	0
C	70	119.429	12	158	51	20.43	0.94	79.57	124901	2	1.1	0.81	4.1	1	A	1	0	0	1	1	0
C	66	164.571	12	161	76	29.32	0.59	102.3	1151868	1b	0.98	0.84	3.6	1	A	1	0	0	0	0	0
C	72	37.4286	8	164.3	53.5	19.82	1.67	40.76	4903775	1b	1.06	1.03	4.1	1	A	1	0	0	0	0	0
C	66	25	12	147	52	24.06	0.8	67.84	504930	1b	1.02	0.35	4.4	0	A	1	0	0	0	0	0
C	73	175.714	12	168.1	66	23.36	0.93	79.87	3894726	1b	1.02	1.04	4.7	1	A	1	0	0	0	0	0
C	71	88	12	150	53	23.56	0.66	88.54	904256	1b	1.02	1.39	3.9	1	A	1	0	0	0	0	0
C	80	50.7143	12	150	44	19.56	1.18	44.18	1462578	1b	0.98	1.09	4.4	1	A	1	0	0	0	1	0
C	74	70.5714	8	159	58	22.94	1.07	67.93	81071	1b	0.89	0.38	3.9	0	A	1	0	0	1	0	0
C	84	60.4286	12	153	40	17.09	1.05	50.05	39395	1b	0.95	0.22	3.3	1	A	1	1	0	0	1	0
C	75	67.1429	12	158	48	19.23	0.62	94.1	3973	1b	0.87	0.42	3.7	1	A	1	0	0	0	0	0
C	71	175.571	12	164	60	22.31	1.28	55.56	1296291	1b	1.15	0.84	3.7	1	A	1	0	0	1	1	0
C	69	39.4286	12	155	78	32.47	1.31	40.37	2177	2	0.97	0.5	4.3	0	A	1	0	0	0	0	0
C	80	107	12	147	48	22.21	0.52	113.75	1747833	1b	0.97	0.61	3.9	0	A	1	0	0	1	1	0
C	84	51.8571	12	153	43	18.37	1.07	65.84	286487	1b	0.96	1.48	3.5	0	A	1	0	0	0	0	0
C	77	75.7143	12	171.9	59.8	20.24	1.07	78.03	979437	1b	0.94	0.89	3.9	0	A	1	0	0	0	0	0
C	69	172.429	12	156	61.5	25.27	0.76	75.68	2239072	1	0.98	0.72	4.3	0	A	1	0	0	0	0	0
C	76	138.714	24	148	55	25.11	0.62	93.59	824135	1b	1.07	1.01	3.2	0	A	1	0	0	0	1	0
C	80	147.857	12	155	68	28.3	1.25	43.64	243937	1b	0.93	0.1	3.3	0	A	0	0	0	1	1	0
C	76	142.286	12	165.8	54	19.64	1.52	44.81	3381549	1b	0.81	0.9	4.1	1	A	1	0	0	0	1	0
C	78	143.571	12	160	50	19.53	1.41	48.74	22734	1	0.89	1.01	4.1	0	A	1	0	0	0	0	0
C	80	72.5714	12	158	60	24.03	0.98	54.75	88569	1b	0.92	0.67	4.2	0	A	1	0	0	0	0	0
C	76	64	12	160	70	27.34	0.81	92.9	2335949	2	0.87	0.45	4.1	0	A	1	0	0	0	0	0
C	84	124.857	12	163.2	74	27.78	1.02	69.75	19635	2	1.01	0.42	3.5	0	A	1	0	0	1	1	0
C	70	105.143	12	168	55	19.49	0.84	90.6	21442	2	1	2.02	3.6	0	A	1	0	0	0	0	0
C	70	153.286	24	172	90	30.42	1.67	41	1217873	1b	0.94	0.88	3.8	0	A	1	1	0	0	0	0
C	71	36.5714	12	153.5	53	22.49	0.7	82.49	748215	1b	0.95	0.6	4.2	0	A	1	0	0	0	0	0
C	87	67.4286	12	180	75	23.15	0.88	82.11	436	1b	0.91	0.45	3.9	0	A	1	0	0	1	1	1
